# **Crowdsourcing Machine Intelligence Solutions to Accelerate Biomedical Science: Lessons learned from a machine intelligence ideation contest to improve the prediction of 3D domain swapping**

Yash Shah<sup>1^</sup>, Deepak Sharma<sup>2^</sup>, Rakesh Sharma<sup>3^</sup>, Sourav Singh<sup>3^</sup>, Hrishikesh Thakur<sup>4^</sup>, William John<sup>5</sup>, Shamsudheen Marakkar<sup>6</sup>, Prashanth Suravajhala<sup>7</sup>, Vijayaraghava Seshadri Sundararajan<sup>8</sup>, Jayaraman Valadi<sup>9</sup>, Khader Shameer<sup>10,11\*</sup> and Ramanathan Sowdhamini<sup>11\*</sup>

<sup>^</sup> Equal contributions

\*Corresponding Authors: [drshameerkhader@gmail.com](mailto:drshameerkhader@gmail.com); [mini@ncbs.res.in](mailto:mini@ncbs.res.in)

<sup>1</sup> Department of Computer Engineering, Thadomal Shahani Engineering College, Mumbai-400050, Maharashtra, India.

<sup>2</sup> Division of NMR Research Centre, Institute of Nuclear Medicine and Allied Sciences (INMAS), DRDO, New Delhi - 110054, India.

<sup>3</sup>Bioinformatics Infrastructure Facility, University of Rajasthan, Jaipur, India.

<sup>4</sup>Persistent Systems, Pune, India

<sup>5</sup>Computer Science Department, New York University, New York, NY 10012

<sup>6</sup>Robotics and Artificial Intelligence, Cochin University of Science and Technology, Kochi, Kerala 682022, India

<sup>7</sup>Department of Biotechnology and Bioinformatics, Birla Institute of Scientific Research, Statue Circle, Jaipur 302001 RJ, India

<sup>8</sup>Data Scientist, Singapore

<sup>9</sup>Department of Computer Science at Flame University, Pune, India

<sup>10</sup>National Centre for Biological Sciences (TIFR), GKVK Campus, Bangalore, 560065, India

<sup>11</sup>The Institute for Next Generation Healthcare, Icahn School of Medicine at Mount Sinai, One Gustave L. Levy Place, New York, NY, 10029, USA.

## Abstract

Machine intelligence methods, including natural language processing, computer vision, machine vision, artificial intelligence, and deep learning approaches, are rapidly evolving and play an essential role in biomedicine. Machine intelligence methods could help to accelerate image analyses aid in building complex models capable of interpretation beyond cognitive limitations and statistical assumptions in biomedicine. However, irrespective of the democratization via accessible computing and software modules, machine intelligence handiness is scarce in the setting of a traditional biomedical research laboratory. In such a context, collaborations with bioinformatics and computational biologists may help. Further, the biomedical diaspora could also seek help from the expert communities using a crowdsourcing website that hosts machine intelligence competitions. Machine intelligence competitions offer a vast pool of seasoned data scientists and machine intelligence experts to develop solutions through competition portals. An alternate approach to improve the adoption of machine intelligence in biomedicine is to offer machine intelligence competitions as part of scientific meetings. In this paper, we discuss a structured methodology employed to develop the machine intelligence competition as part of an international bioinformatics conference. The competition leads to developing a novel method through crowdsourcing to solve a challenging problem in biomedicine – predicting probabilities of proteins that undergo 3D domain swapping. As a biomedical science conference focused on computational methods, the competition received multiple entries that ultimately helped improve the predictive modeling of 3D domain swapping using sequence information.

## Background

The rapid advent of advanced molecular profiling and experimental methods, including sequencing, gene-editing, and multi-omics technologies during the last decade, has enabled biology to enter the era of ‘Big Data.’(1-8). However, the computational efficiency of analyzing and interpreting petabyte-scale data has become a bottleneck. Although significant “interpretation gap” in biomedicine where extensive, multi-scale data on various disease modalities exist, the collective impact of defining such datasets remain limited. In this regard, bioinformatics approaches have uprooted wherein robust statistical learning and reproducible machine intelligence methods are evolving to play a crucial role in addressing the inference challenges.

In this era of smart algorithms and artificial-intelligence driven knowledge banks, bioinformatics applications could make an immediate impact in the setting of molecular medicine, drug development, crop improvement, gene therapy, microbial genome annotation, and assembly, etc. Integrating the complexity of biomedicine data with modern machine intelligence methods followed by orthogonal and experimental validations could lead to uncovering new biological themes and ultimately aid in discovery. The recent advances in different areas of machine intelligence, including deep learning, reinforcement learning, and growth towards developing general intelligence, would eventually enable such methods as a pivotal part of biomedical discovery research(7,9-11).

## **Challenges in democratizing machine intelligence for biomedicine**

Machine intelligence methods are currently going through an “AI Spring” with extensive focus on developing new techniques. Industry sectors across different verticals, including healthcare, life science, biotech, pharma, and medical device technology is making significant investments to improve data access along with design, development, and deployment of machine intelligence methods(12-14). Design development and implementation of reproducible machine intelligence approaches need substantial investment to acquire diverse talent, computing resources, and deployment infrastructure.

To illustrate the complexity of one factor: computing resourcing– extensive evaluations are often required to leverage in-house, cloud, or hybrid mode of computing infrastructure(15). Depending on the nature of the problem to solve, computing infrastructure and software systems could be selected. For example, cloud computing vendors like Microsoft Azure, Google, Amazon Web Services offers a wide variety of operating systems, database solutions, operating systems, and machine learning frameworks along with a custom framework for rapid design, development, and deployment of machine learning solutions. Ultimately, the choices and decisions in every step could influence the cost of computing and the development of machine intelligence solutions. Delivery of a machine intelligence solution requires a team that comprises a domain expert to curate and interpret the data, data engineer to clean and compile data sets and data scientists to develop the model. Often the implementation needs solution architectures and software

engineers to build web service, client-server architecture, and endpoints as web or mobile applications(16).

### **Crowdsourcing, Online Competitions and Innovation Contests: Past, Present and Emerging Trends:**

Online coding competitions, such as Kaggle data competitions, Netflix data competitions, Google Code Jam, all help participants practice critical thinking, fast and efficient coding, and the ability to design and then implement algorithms in code. These competitions allow for coders to learn new technologies that they would not have learned otherwise. These new technologies and techniques can then be brought back to the coder's daily lives at work for improvements and to overcome obstacles in a unique, refreshing manner. These competitions are grounds for new and different approaches to solving a common problem, by experiencing more ways to tackle a problem, participants can learn coding standards and adapt methods proposed by creative coders, with more tools at hand. Furthermore, the issues at various online coding competitions are modeled after real-world problems. For example, Kaggle, a highly popular site that hosts data science and machine learning competitions, provides data sets that expose participants to forecasting, sentiment analysis, natural language processing, and image classification problems. These topics are very applicable to real-life problems and are also at the forefront of current technology. Although there is a wide range of topics, each question that a participant picks forces them to learn about the context of the problem, the data,

and the approach to the problem. Of course, this will spawn many nuanced different techniques that everyone can view and glean information from.

Competitions at their heart compare the outputs of different teams, and a ranking system spurs on coders to become better, more efficient, and they are an excellent way for a bioinformatician, data scientist, data engineer or software developer collectively called as a coder to test themselves based on the population. With official online competitions, participants have to work efficiently and on-time, while making sure their solutions are time and memory efficient. With competition, there is a constant need for the participant to improve their code and look for ways to separate themselves from the pack. If everyone has the same data and access to algorithms, coders are forced to find ways to push their code forward, which will lead to innovations. While people find success in these online competitions, other coders that are looking to begin participating in coding competitions can look up to top performers as role models, and experts in the respective fields will guide them by following the winning code. The desire to win a competition, will create changes in the field of study, push the previously established limits of performance, and also connect like-minded or different-minded people to form communities that will be able to tackle the problem in many different ways.

For example, the ImageNet challenge is an example that revolutionized the domain of deep learning applied to computer vision(17). ImageNet challenge, which revolutionized the field of deep learning and applied computer vision. ImageNet

Large Scale Visual Recognition Challenge (ILSVRC) started in 2010 with a dedicated database for visual recognition called ImageNet dataset, which is also a result of crowdsourcing. The image-level annotation of the database is done by crowdsourcing with more than 14 million annotated images for visual/ object recognition. It was in 2012, Alex Krizhevsky came up with a model named AlexNet(18), which performed incredibly in the contest with a top-5 error of 15.3% and the manuscript “Imagenet classification with deep convolutional neural networks” has got more than forty thousand citations till date. AlexNet introduced many new methods, including the GPU utilized training, which fueled the deep learning and computer vision revolution. After AlexNet, it was a rally of algorithms and architectures with better performance in the followed years’ contests, including Microsoft’s ResNet(19) and inception by Google. Several other machine learning and deep learning contests and challenges emerged from the inspiration of the Imagenet problem in recent years. And all of them, students, and researchers across the globe are contributing to the community in association with these challenges.

### **Crowdsourcing machine learning solutions in biomedicine**

Crowdsourcing is the practice of engaging a ‘crowd’ or group for a common goal to innovate, design, solving a problem(1,20). With a lot of unsolved problems in biology, the use of crowdsourcing to solve important but complex problems in biomedical and clinical sciences is growing and encompasses a wide variety of approaches which include data mining crowd-generated data in healthcare or open source platforms [4]. To democratize machine intelligence and familiarize the

research community with machine intelligence methods, crowdsourcing competitions could be an ideal solution. Crowdsourcing is emerging as a recent trend in biomedical science that aims to tap into the skills not immediately available in a laboratory setting due to specialty or scalability of a task. One of the classical examples of crowdsourcing in biomedicine includes Folding @Home, which aim to use idle computing time from registered users to perform computationally expensive protein folding classification. Further, biomedical applications that benefitted from crowdsourcing includes genomic variant curation, bioinformatics research, health surveillance, protein folding research, proteomics, environmental research, stem cell biology research, public health research and data visualization (See **Table: 1**)(21-42). Recent examples including classification of acoustic datasets, identification of chemical induced diseases, clinical trial result summarization, therapeutic area-specific knowledge assimilation in the area of dermatology and plant phenomics (43-47). A conceptual framework for crowdsourcing an ideation contest is given in **Figure: 1**.

### 3D Domain Swapping

3D domain swapping is a mechanism by which two or more protein chains form a dimer or higher oligomer by exchanging an identical structural element. While the mechanism was first observed in 1964 and conceptualized in 1994(48-51). Proteins, including antibody fragments, human prion protein, crystallins, growth factors, cytokines, etc. are involved in 3D domain swapping. The precise roles of domain swapping as a causal factor of different disease pathways, including conformational



and deposition diseases, to remain elusive(52). However, experimental studies have suggested that change in environment (low pH, temperature, denaturants) or genetic predisposition may lead to 3D domain swapping. A systematic survey of 293 proteins with swapped conformation revealed several biological clues including the functional landscape, disease associations and pathways that are driven by proteins in swapped conformation(53). Biophysical impact, including the kinetic effect (closed interface) or dynamic effect (open interface), has also been suggested. A curated knowledgebase of proteins involved in 3D domain swapping “3DSwap” is available in the public domain from <http://caps.ncbs.res.in/3dswap/> based on the graduate research by one of the Ideation contest developer (KS) and supervised by the Ideation contest evaluator (RS)(54). Data compiled in 3DSwap database was used to establish first prediction algorithms using machine learning and artificial intelligence approaches including support vector machines (SVM; model accuracy 63.8%) and RandomForest (RF; model accuracy: 73.81%) models(55,56). These models can perform prediction, instead of experimental characterization of domain swapping. Where the latter is expensive and time-consuming, prediction algorithms were applied to human proteome and identified new proteins to be associated with features of swapping.

### **Crowdsourcing to Improve Prediction of 3D Domain Swapping from Sequence Information:**

Indian Conference on Bioinformatics (Inbix’17) held at Birla Institute of Scientific Research, Jaipur, India. The Inbix’17 program had a participation of 190 delegates

besides keynote speakers, invited speakers, oral and poster, and ideation challenge presenters. We asked the Inbix '17 conference attendees to improve this sequence-based model published in 2010/2011 and provide a higher accuracy model by adopting new feature engineering strategies and novel machine learning approaches, including deep learning. The model with better accuracy and biologically relevant feature engineering approached was highly encouraged as part of the results submission.

### **Guidelines for contest to improve prediction of 3D domain swapping:**

Problem definition (See Supplemental Material for Ideation Challenge notice) and link to access data set (See Supplemental Material for positive and negative datasets) was given to the participants of the conferences using the website of the meeting. Conference organizers used social media and other outlets to publicize the contest across the world. No additional guidelines were given to generate features or the selection of machine learning, as this may hinder novel contributions from the community. The results were compiled using an evaluation framework by a team of researchers. Models were evaluated for innovation, feature engineering strategy, algorithm applied to develop predictive model, the robustness of validation method, and net improvement in the prediction of 3D domain swapping compared to the model published earlier.

### **Proposed solutions:**

Each of the three predictive models proposed approached the problem in different ways (Also See **Table: 2**). Preprocessing techniques like feature extraction and feature selection are way different, and a variety of model optimization methods are tried to get a more accurate prediction model possible. A brief description and critical appraisal of the models are given below for brevity. A fourth submission was a conceptual overview to address the biological knowledge gap in the setting of 3D domain swapping. The original version of the submission of the solution for different solutions and all associated data and code is available in the Supplemental Materials (Also see **Figure: 2**).

### **Summary and Critical evaluation of Models:**

**Model 1:** The first model coded entirely in R language, uses R library packages for both feature engineering and model design. The preprocessing is a crucial part of machine learning, which includes data cleaning, feature extraction, and feature selection. R package named “peptides” (See: <https://cran.r-project.org/web/packages/Peptides/index.html>) is doing all the feature generation jobs in this model. Peptides package has several useful functions to calculate indices and physicochemical properties of protein sequences. Boruta package in R was used for feature selection (57), which is the process of selecting only the relevant features which affect domain swapping, and 652 features are finally confirmed. Boruta uses Random Forest by default to search for relevant features by comparing primary attribute importance with importance achievable in random, subtracting the irrelevant features to stabilize the needed features. Even though time-consuming,

the boruta method outputs enough, and efficient data for the model to learn, gives the best model accuracy and avoids the problem of overfitting. The final dataset with total samples of 1185 is split cleverly into 80%: 20% for training and testing, respectively. This data is trained on a random forest algorithm with a set of well-tuned parameters. Successful optimization for parameters like the number of trees and mtry gives a final result of 91.03% training accuracy, 91.22% accuracy after five-fold cross-validation, and 90.29% testing accuracy with 3000 trees and 656 mtry. The R package *Boruta* was used for feature extraction. The modelers split that into the ratio of 80:20 for training and test set. No validation set was provided. The submitters used the training set to select models, which are slightly flawed as there may be a possibility of the model overfitting on the training set and them not knowing until they do their final test on the test set. Note that a shallow neural net and various R neural net packages did not perform as well as the random forest model used by the earlier model. This may be due to the nature of the data, data preprocessing, not enough resources or time to train a massive neural net, or just a flawed implementation of the correct network structure. The group achieved a somewhat high training and validation accuracy of around 90%, much higher than the other groups.

**Model-2:** The second model proposes a method called ensemble modeling in which soft voting is carried out between two classifiers after feature engineering. In the feature engineering part, efficient data cleaning is done as the redundant sequences are entirely dropped. Concentrating more on data cleaning and feature engineering,

this model uses different library packages for feature extraction like modlAMP (See: <https://modlamp.org/>), etc. Feature selection is carried out by using python's scikit-learn's simple but powerful feature selection library called selectKbest, which uses mutual information gain for selecting top features(58,59). An ensemble model is proposed in which soft voting is carried out between two simple and accurate predicting algorithms, AdaBoost and XGBoost(60). Both the algorithms are fine-tuned to get the best parameter possible with the data. The fine-tuned models are put in a Voting Classifier with a weight of 4:6 with a majority in favor of XGBoost Classifier. A better performance was observed with an accuracy of 75.63% after five-fold cross-validation.

**Model-3:** While the first two models focus on solving the problem using classical machine learning algorithms, the third model uses an artificial neural network algorithm, which comes under the deep learning approaches. Standardization is done on the features to make all the features on a common scale with zero mean and unit variance. This ensures less computation time and removal of data overfitting by bringing the range and scale of the feature variables to a standard measure. Especially in multi-layer perceptron (MLP(61)) models, standardization is usually done on the data to decrease the time taken by the model for weight optimization. The feature selection part removes redundant features and reduces the dimensionality of the dataset to ensure reasonable accuracy and an improved result. Feature selection model selected top 15 features out of 66 features extracted from the training and testing phase of the modeling. The conventional train test split of

70:30 is done on the sample of size 426, which gives 300 examples for training and 126 samples for testing. The train- test data is well-balanced such that both of them consist of half of the samples from every two classes. That is, 300 training samples have 150 samples from positive class and 150 from negative class in it, to avoid class imbalance. The data is then fed into an MLP, which is an artificial neural network classifier that uses back propagation algorithm for learning and error correction. The model follows simple multi-layer neural network architecture with five neurons in the first hidden layer and two neurons in the second hidden layer. Hyperparameters like a number of hidden layers, activation function, and solver are optimized and fine-tuned to reach out to the best result of 76.67% accuracy in 10-fold cross-validation and test accuracy of 72.5%. The coding part is supported by several python-machine learning library modules from scikit-learn such as SelectKbest for feature selection, MLP, StandardScaler for data normalization, and other modules for metrics and cross-validation. These packages help to implement a useful model in a few lines of code. One problem may be the lack of training examples; only 150 positive and 150 negative data points were used. The network was not very deep as it was two layers deep with five and then two units, respectively considering limited training data set. This was an interesting approach as it attempted to use a neural network to approximate a nonlinear function. However, many questions arise from this implementation: including the need for a deep learning approach is necessary or overengineering the problem. It is unclear whether the proposed layers are enough or more hidden layers, and units are

needed to learn a machine problem with a limited dataset. Alternate network structures that could work better than a feed-forward network was not addressed.

### **From domain swapping to drug targeting: pushing the boundaries on targeting domains of unknown function**

The 3D swap database has a couple of domains of unknown function (DUF), which we would like to consider a case study to infer the role of aptamers. Assuming that the functions of DUFs and hypothetical proteins (HP) can leverage as targets for diagnostics, the most common entity used are antibodies which could circumvent the effect/targets. While the experimental characterization of antibodies is cumbersome, it is assumed that aptamer-protein prediction methods may serve as a benchmark besides providing cost-effective measures(62-64). In this ideation example, we propose a hypothesis whether the aptamer is bound in the setting of a 3D domain-swapped conformation. If so, could it be applied for domains caused due to extensive multimerization as well? To answer this, we have considered the DUFs with a PDB entry 2A9U ([http://caps.ncbs.res.in/cgi-bin/mini/databases/3Dswap/3dswap\\_entry.cgi?id=2A9U](http://caps.ncbs.res.in/cgi-bin/mini/databases/3Dswap/3dswap_entry.cgi?id=2A9U) and **Figure 2**). As there is a dimer interface communicated to the catalytic domain of 2A9U, we assumed that the aptamers specific to this variable fragment could be used. With this approach, we expect that through the antigen-binding capacity of aptamer with the molecule, a vast number of HPs or DUFs can be targeted, which could be associated with diseases. Thus, authors hope active conformation and aptamers as small molecules for therapies could prove to be very useful in the development of treatment for

several diseases where 3D domain swapping is a known pathological mechanism. To conclude, we hypothesize that the role of aptamers over antibody isotypes can be inferred and based on the affinity of aptamers bound to swapped domains particular to HPs or DUFs.

## **Discussion**

With the current status of poor outcomes in recent clinical trials in the setting of neurodegenerative diseases, novel drug discovery and drug repositioning approaches are required to address the pathological basis of protein conformation diseases like Alzheimer's diseases(65-69). Collectively, the ideation contest helped to apply modern algorithms, new feature engineering and feature selection methods to enhance the prediction of 3D-domain swapping – a key mechanism in the setting of conformational diseases. Improving the prediction accuracy of 3D domain swapping from sequence information using machine learning is critical to enable the rapid characterization of a novel structural phenomenon. In this paper, we discuss about developing an ideation contest to improve prediction of 3D domain swapping from sequence information. We discuss about the 3D domain swapping mechanism and provide an overview of model proposed by leveraging different machine learning approaches to predict whether a given protein is swapping or non-swapping. 3D domain swapping is a process through which a protein oligomer is formed from their monomers.



The rationale for predict 3D domain swapping from sequence information is based on the classical Anfinsen's dogma postulation that the native structure of a protein sequence is determined by the properties of the amino acids of that protein sequence. Three different machine learning approaches were proposed by the ideation contestants for successfully predict and classify proteins into swapping or non-swapping proteins. Compared to the original models published in 2010 and 2011; modern machine intelligence approaches helped to improve the model modestly. The improvement could have been much better with more data availability. Thus, proposing machine intelligence contests as part of biomedical conferences may help to enhance the discovery of novel biomedical insights.

## **Conclusions**

Biomedical Data Scientists could design and develop Machine Intelligence-based informatics solutions to address challenges in biology and medicine. Machine Intelligence is evolving as a critical analytical theme in biomedicine due to the advent of big data, scalable and affordable cloud computing and modern machine learning toolkits. Leading biomedical science and informatics conferences could organize ideation contests, predictive modeling competitions and crowdsourcing efforts to improve the democratization of machine learning in bioscience. We used a machine learning ideation competition to revisit the problem of predicting the 3D domain swapping - a mechanistic basis of protein conformations in neurodegenerative diseases; as part of an international bioinformatic conference. New insights and a variety of solutions were proposed to address the challenging

problem of predicting protein aggregation mechanism from sequence information. Collectively, the crowdsourcing results from ideation competition could help to push the conceptual boundaries and unlock new ideas to understand complex mechanisms like 3D domain swapping.

### **Data, Source Code and Model Availability:**

- Supplemental Materials are available from figshare:

<https://doi.org/10.6084/m9.figshare.8317067.v1>

Source code is available at the following repositories:

- Model-1: [https://github.com/DBT-BIF/Inbix\\_ideation](https://github.com/DBT-BIF/Inbix_ideation)
- Model-2: <https://github.com/souravsingh/Ideation-Challenge>
- Model-3 [https://github.com/shahyash-95/ideation.challenge\\_inbix2017](https://github.com/shahyash-95/ideation.challenge_inbix2017)

### **Acknowledgements**

R.S. and K.S. acknowledge National Centre for Biological Sciences (TIFR) for infrastructural and financial support. R.S. was a Senior Research Fellow of the Wellcome Trust, U.K. R.S. and G.A. thank Department of Biotechnology, Government of India for financial support. Rakesh and Deepak acknowledge the infrastructure support from the Bioinformatics Infrastructure Facility (DBT-BIF), University of Rajasthan, Jaipur.

### **Competing Interests:**

KS has received consulting fees or honoraria from McKinsey & Company, Alphabet, LEK Consulting, Parthenon-EY, Philips Healthcare, OccamzRazor and Kencore Health. At the time of publication, KS is an employee of AstraZenca, Gaithersburg, MD.

## Biographical Notes:

Yash Shah holds a Bachelor's degree in Computer Engineering from Mumbai University, an experienced software engineer and currently working as Research Bioinformatician at ACTREC, Tata Memorial Centre, Mumbai, Maharashtra, India.

Deepak Sharma is a Doctoral student in Indraprastha Institute of Information Technology, Delhi, and a Senior Research Fellow in the Institute of Nuclear Medicine and Allied Sciences (DRDO), New Delhi, India.

Rakesh Sharma is a Bioinformatician in Bioinformatics Infrastructure Facility, University of Rajasthan, Jaipur, India.

Sourav Singh has a BE degree in Computer Engineering from VIIT, Pune, India.

Hrishikesh Thakur holds an M.Tech Degree in Modelling and Simulation from Savitri Bai Phule Pune University, Pune, India.

William John is an alumnus of the Computer Science Department, New York University, New York, NY, USA.

Shamsudheen Marakkar is a student a Robotics and Artificial Intelligence MTech student at Cochin University of Science and Technology, Kochi, Kerala, India.

Prashanth Suravajhala is a Senior Scientist in Systems Genomics based in Birla Institute of Scientific Research, Jaipur, India. He can be reached at <http://wiki.bioinformatics.org/prash>

Vijayaraghava Seshadri Sundararajan is a Data Scientist in Singapore.

Jayaraman Valadi is currently a Distinguished Professor of Computer Science at Flame University, Pune, India.

Khader Shameer was a member of the Institute for Next Generation Healthcare, Icahn School of Medicine at Mount Sinai, Mount Sinai Health System. At the time of publication, Shameer is a Senior Director (Data Science, Advanced Analytics, and Bioinformatics) with AstraZeneca.

Ramanathan Sowdhamini is a professor at the department of biochemistry, biophysics, and bioinformatics of the National Centre for Biological Sciences and leads the Computational Approaches to Protein Sciences laboratory.

**Figures:**

**Figure 1:** Strategic framework for developing and organizing an ideation contest

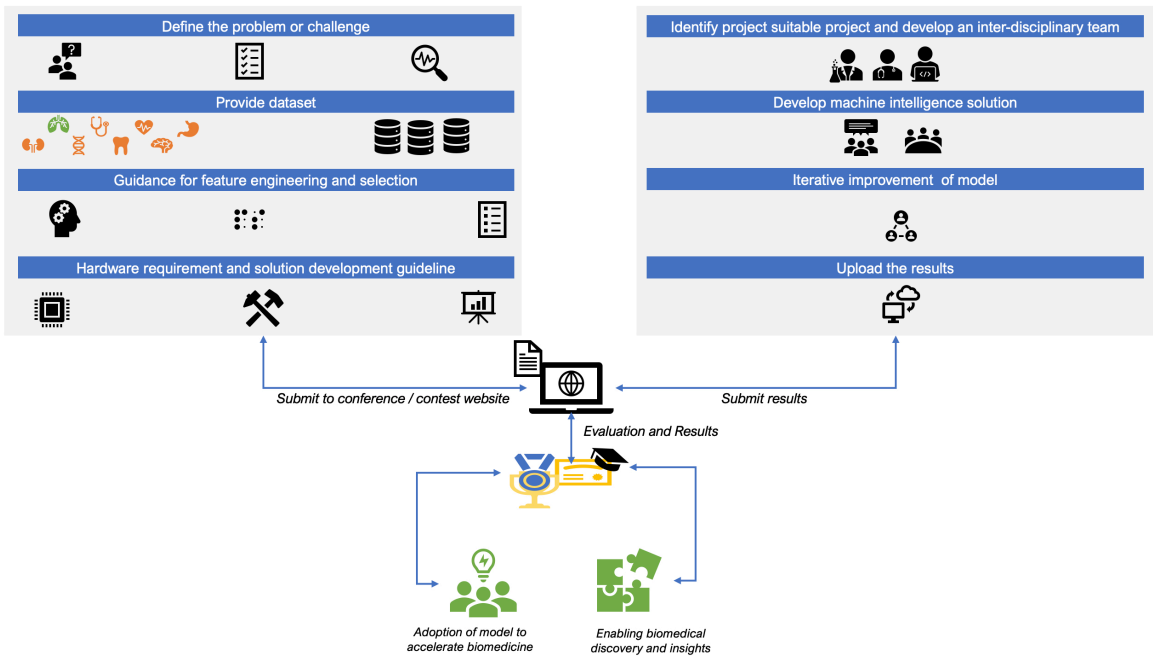

**Figure 2:** Summary of machine intelligence strategies used to improve prediction of 3D-domain swap using machine intelligence methods. a) Plot between Accuracy and number of randomly selected predictors used for grid searching in Model-1; b) ROC curve of Model-2; c) Features selected v/s cross-validation scores on training samples compiled from Model-3. d) Neural network architecture used in Model-2 e) 3D model of Ubiquitin carboxyl-terminal hydrolase 8 – a human hydrolase enzyme.

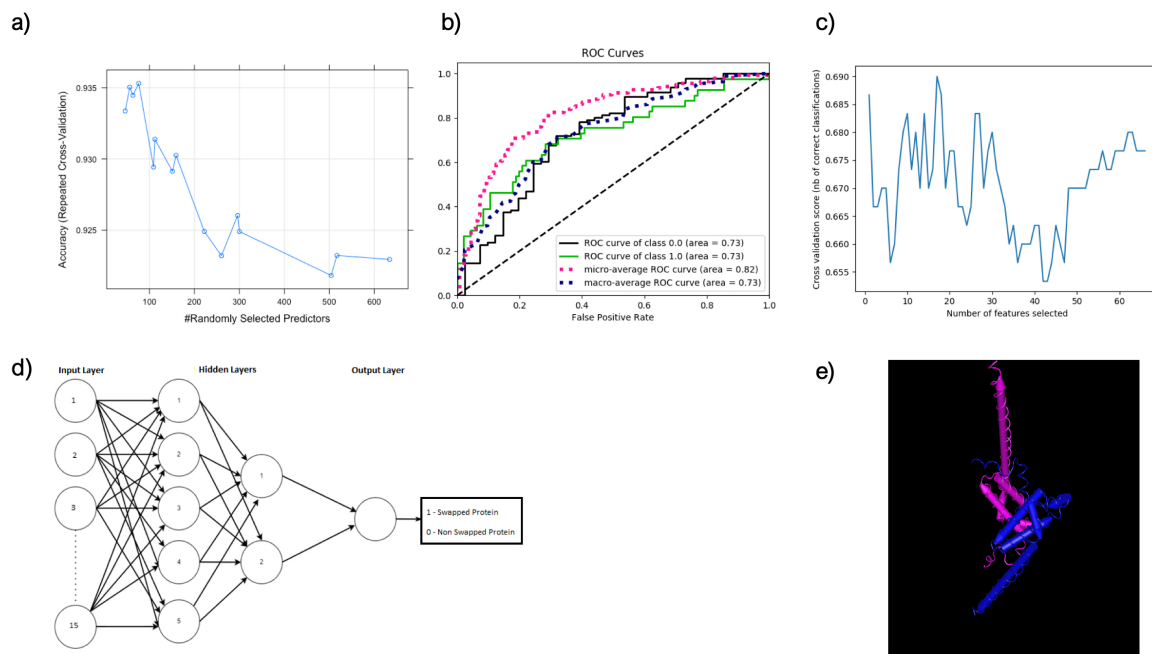

## Tables:

**Table 1:** Competitions, Ideations, Conferences and Platforms for crowdsourcing in biomedicine

| Name                                                       | Description                                                                                                                                                                                                                                                                      | URL                                                                                                                                                                                               |
|------------------------------------------------------------|----------------------------------------------------------------------------------------------------------------------------------------------------------------------------------------------------------------------------------------------------------------------------------|---------------------------------------------------------------------------------------------------------------------------------------------------------------------------------------------------|
| <b>Platforms for Conducting Crowdsourcing</b>              |                                                                                                                                                                                                                                                                                  |                                                                                                                                                                                                   |
| CodaLab Competitions                                       | Open source framework for running competitions that involve result or code submission including several biomedical challenges and competitions                                                                                                                                   | <a href="https://competitions.codalab.org/competitions/">https://competitions.codalab.org/competitions/</a>                                                                                       |
| Driven Data                                                | Platform for hosting social challenges including multiple biomedicine challenges                                                                                                                                                                                                 | <a href="https://www.drivendata.org/competitions/">https://www.drivendata.org/competitions/</a>                                                                                                   |
| Innocentive                                                | Global platform for crowdsourced innovation                                                                                                                                                                                                                                      | <a href="https://www.innocentive.com/">https://www.innocentive.com/</a>                                                                                                                           |
| Kaggle                                                     | Community of data scientists and machine learners with multiple biomedicine challenges                                                                                                                                                                                           | <a href="https://www.kaggle.com/">https://www.kaggle.com/</a>                                                                                                                                     |
| <b>Machine Intelligence Competitions in Biomedicine</b>    |                                                                                                                                                                                                                                                                                  |                                                                                                                                                                                                   |
| Artificial Intelligence (AI) Health Outcomes Challenge     | Hosted by Centers for Medicare & Medicaid Services to develop interpretable models to predict unplanned hospital and senior nursing facility admissions and adverse events within 30 days for Medicare beneficiaries, based on a data set of Medicare administrative claims data | <a href="https://innovation.cms.gov/initiatives/artificial-intelligence-health-outcomes-challenge/">https://innovation.cms.gov/initiatives/artificial-intelligence-health-outcomes-challenge/</a> |
| Critical Assessment of Function Annotation (CAFA)          | Critical Assessment of protein Function Annotation algorithms (CAFA) is an experiment designed to provide a large-scale assessment of computational methods dedicated to predicting protein function, using a time challenge                                                     | <a href="https://biofunctionprediction.org/cafa/">https://biofunctionprediction.org/cafa/</a>                                                                                                     |
| Critical Assessment of Genome Interpretation (CAGI)        | Community experiment to objectively assess computational methods for predicting phenotypic impacts of genomic variation and to inform future research directions                                                                                                                 | <a href="https://genomeinterpretation.org/">https://genomeinterpretation.org/</a>                                                                                                                 |
| Critical Assessment of protein Structure Prediction (CASP) | Community experiment to help advance the methods of identifying protein structure from sequence                                                                                                                                                                                  | <a href="http://predictioncenter.org/">http://predictioncenter.org/</a>                                                                                                                           |
| Data Science                                               | Data science for social good competition                                                                                                                                                                                                                                         | <a href="https://datasciencebowl.com">https://datasciencebowl.com</a>                                                                                                                             |

|                                                                      |                                                                                                                                                                  |                                                                                               |
|----------------------------------------------------------------------|------------------------------------------------------------------------------------------------------------------------------------------------------------------|-----------------------------------------------------------------------------------------------|
| Bowl                                                                 |                                                                                                                                                                  | m/                                                                                            |
| DREAM Challenges                                                     | DREAM Challenges invite participants to propose solutions to fundamental biomedical questions — fostering collaboration and building communities in the process. | <a href="http://dreamchallenges.org/">http://dreamchallenges.org/</a>                         |
| PhysioNet Computing in Cardiology Challenges                         | Multiple contests that leverage PhysioNet data to develop clinical informatics solutions                                                                         | <a href="https://physionet.org/challenge/">https://physionet.org/challenge/</a>               |
| Folding@Home                                                         | Distributed computing project for disease research that simulates protein folding, computational drug design, and other types of molecular dynamics              | <a href="https://foldingathome.org/">https://foldingathome.org/</a>                           |
| Grand Challenges                                                     | Collection of Grand Challenges in Biomedical Image Analysis                                                                                                      | <a href="https://grand-challenge.org/">https://grand-challenge.org/</a>                       |
| Partners HealthCare Biobank Disease Challenge                        | Develop phenotypic algorithms that will aid in determining a patient's disease status                                                                            | <a href="https://datachallenge.partners.org/">https://datachallenge.partners.org/</a>         |
| <b>Conferences with co-located machine intelligence competitions</b> |                                                                                                                                                                  |                                                                                               |
| Inbix Ideation Challenge                                             | First edition of Inbix conference launched with an ideation challenge to predict 3D domain swapping using sequence information                                   | <a href="https://easychair.org/cfp/inbix19">https://easychair.org/cfp/inbix19</a>             |
| International Joint Conference on Neural Networks                    | Multiple competitions including biomedical problems (for example, falls prediction in 2019)                                                                      | <a href="https://www.ijcnn.org/2019-competitions">https://www.ijcnn.org/2019-competitions</a> |
| KDD Cup                                                              | Data Mining and Knowledge Discovery competition organized by ACM Special Interest Group on Knowledge Discovery and Data Mining                                   | <a href="https://www.kdd.org/kdd-cup">https://www.kdd.org/kdd-cup</a>                         |
| PAC 2019                                                             | Leveraging the Photon platform to develop solution to solve a problem in the domain of neuroscience                                                              | <a href="https://www.photon-ai.com/pac2019">https://www.photon-ai.com/pac2019</a>             |



**Table 2:** Summary of models submitted to ideation contest to improve the prediction of 3D domain swapping from sequence information

| <b>Models</b> | <b>FE-Strategy</b>      | <b>Algorithm</b> | <b>Reported AUC</b> | <b>Packages</b>         | <b>Features</b> |
|---------------|-------------------------|------------------|---------------------|-------------------------|-----------------|
| Model-1       | Boruta method           | Nnet             | 90.73%              | Boruta, nnet, neuralnet | 8521            |
| Model-2       | Mutual information gain | XGBoost          | 75.63%              | Scikit-learn, XGBoost   | 369             |
| Model-3       | Selectkbest             | MLP              | 72.5%               | scikit-learn            | 66              |

## References:

1. Saez-Rodriguez, J., Costello, J.C., Friend, S.H., Kellen, M.R., Mangravite, L., Meyer, P., Norman, T. and Stolovitzky, G. (2016) Crowdsourcing biomedical research: leveraging communities as innovation engines. *Nat Rev Genet*, **17**, 470-486.
2. Liu, C.H., Wu, D.Y. and Pollock, J.D. (2012) Bioinformatic challenges of big data in non-coding RNA research. *Front Genet*, **3**, 178.
3. Marx, V. (2013) Biology: The big challenges of big data. *Nature*, **498**, 255-260.
4. Khan, N., Yaqoob, I., Hashem, I.A., Inayat, Z., Ali, W.K., Alam, M., Shiraz, M. and Gani, A. (2014) Big data: survey, technologies, opportunities, and challenges. *ScientificWorldJournal*, **2014**, 712826.
5. Krumholz, H.M. (2016) The Promise of Big Data: Opportunities and Challenges. *Circ Cardiovasc Qual Outcomes*, **9**, 616-617.
6. Leonelli, S. (2019) The challenges of big data biology. *Elife*, **8**.
7. Mooney, S.J. and Pejaver, V. (2018) Big Data in Public Health: Terminology, Machine Learning, and Privacy. *Annu Rev Public Health*, **39**, 95-112.
8. Perakslis, E., Riordan, H., Friedhoff, L., Nabulsi, A. and Pich, E.M. (2019) A call for a global 'bigger' data approach to Alzheimer disease. *Nat Rev Drug Discov*, **18**, 319-320.
9. Neftci, E.O. and Averbek, B.B. (2019) Reinforcement learning in artificial and biological systems. *Nature Machine Intelligence*, **1**, 133-143.
10. Rajkomar, A., Dean, J. and Kohane, I. (2019) Machine Learning in Medicine. *N Engl J Med*, **380**, 1347-1358.

11. Fogel, A.L. and Kvedar, J.C. (2018) Artificial intelligence powers digital medicine. *npj Digital Medicine*, **1**, 5.
12. Shameer, K., Johnson, K.W., Glicksberg, B.S., Dudley, J.T. and Sengupta, P.P. (2018) The whole is greater than the sum of its parts: combining classical statistical and machine intelligence methods in medicine. *Heart*, **104**, 1228.
13. Shameer, K., Johnson, K.W., Glicksberg, B.S., Dudley, J.T. and Sengupta, P.P. (2018) Machine learning in cardiovascular medicine: are we there yet? *Heart*, **104**, 1156-1164.
14. Shameer, K., Nayariseri, A., Romero Duran, F.X. and Gonzalez-Diaz, H. (2017) Editorial: Improving Neuropharmacology using Big Data, Machine Learning and Computational Algorithms. *Curr Neuropharmacol*, **15**, 1058-1061.
15. Dudley, J.T. and Butte, A.J. (2010) In silico research in the era of cloud computing. *Nat Biotechnol*, **28**, 1181-1185.
16. Celi, L.A., Fine, B. and Stone, D.J. (2019) An awakening in medicine: the partnership of humanity and intelligent machines. *The Lancet Digital Health*, **1**, e255-e257.
17. Russakovsky, O., Deng, J., Su, H., Krause, J., Satheesh, S., Ma, S., Huang, Z., Karpathy, A., Khosla, A., Bernstein, M. *et al.* (2015) ImageNet Large Scale Visual Recognition Challenge. *Int. J. Comput. Vision*, **115**, 211-252.
18. Krizhevsky, A., Sutskever, I. and Hinton, G.E. (2012), *Proceedings of the 25th International Conference on Neural Information Processing Systems - Volume 1*. Curran Associates Inc., Lake Tahoe, Nevada, pp. 1097-1105.

19. He, K., Zhang, X., Ren, S. and Sun, J. (2016), *2016 IEEE Conference on Computer Vision and Pattern Recognition (CVPR)*, pp. 770-778.
20. Khare, R., Good, B.M., Leaman, R., Su, A.I. and Lu, Z. (2016) Crowdsourcing in biomedicine: challenges and opportunities. *Brief Bioinform*, **17**, 23-32.
21. Su, A.I., Good, B.M. and van Wijnen, A.J. (2013) Gene Wiki Reviews: marrying crowdsourcing with traditional peer review. *Gene*, **531**, 125.
22. Johnston, S.C. and Hauser, S.L. (2009) Crowdsourcing scientific innovation. *Ann Neurol*, **65**, A7-8.
23. (2011) Crowdsourcing human mutations. *Nat Genet*, **43**, 279.
24. Prill, R.J., Saez-Rodriguez, J., Alexopoulos, L.G., Sorger, P.K. and Stolovitzky, G. (2011) Crowdsourcing network inference: the DREAM predictive signaling network challenge. *Sci Signal*, **4**, mr7.
25. Armstrong, A.W., Cheeney, S., Wu, J., Harskamp, C.T. and Schupp, C.W. (2012) Harnessing the power of crowds: crowdsourcing as a novel research method for evaluation of acne treatments. *Am J Clin Dermatol*, **13**, 405-416.
26. Edwards, S.V. (2013) Next-generation QTL mapping: crowdsourcing SNPs, without pedigrees. *Mol Ecol*, **22**, 3885-3887.
27. Good, B.M. and Su, A.I. (2013) Crowdsourcing for bioinformatics. *Bioinformatics*, **29**, 1925-1933.
28. Hildebrand, M., Ahumada, C. and Watson, S. (2013) CrowdOutAIDS: crowdsourcing youth perspectives for action. *Reprod Health Matters*, **21**, 57-68.

29. MacLean, D.L. and Heer, J. (2013) Identifying medical terms in patient-authored text: a crowdsourcing-based approach. *J Am Med Inform Assoc*, **20**, 1120-1127.
30. McCartney, P. (2013) Crowdsourcing in healthcare. *MCN Am J Matern Child Nurs*, **38**, 392.
31. Porcello, D. and Hsi, S. (2013) Science education. Crowdsourcing and curating online education resources. *Science*, **341**, 240-241.
32. Brabham, D.C., Ribisl, K.M., Kirchner, T.R. and Bernhardt, J.M. (2014) Crowdsourcing applications for public health. *Am J Prev Med*, **46**, 179-187.
33. Kahlon, M., Yuan, L., Gologorskaya, O. and Johnston, S.C. (2014) Crowdsourcing the CTSA innovation mission. *Clin Transl Sci*, **7**, 89-92.
34. Colvis, C.M. and Austin, C.P. (2015) The NIH-Industry New Therapeutic Uses Pilot Program: Demonstrating the Power of Crowdsourcing. *Assay Drug Dev Technol*, **13**, 297-298.
35. Hogg, W.E. (2015) Crowdsourcing and patient engagement in research. *Can Fam Physician*, **61**, 283-284.
36. Keuleers, E. and Balota, D.A. (2015) Megastudies, crowdsourcing, and large datasets in psycholinguistics: An overview of recent developments. *Q J Exp Psychol (Hove)*, **68**, 1457-1468.
37. Mohammadi, D. (2015) ENIGMA: crowdsourcing meets neuroscience. *Lancet Neurol*, **14**, 462-463.
38. Blackwell, K.A., Travis, M.J., Arbuckle, M.R. and Ross, D.A. (2016) Crowdsourcing medical education. *Med Educ*, **50**, 576.

39. Jenkins, A., Croitoru, A., Crooks, A.T. and Stefanidis, A. (2016) Crowdsourcing a Collective Sense of Place. *PLoS One*, **11**, e0152932.
40. Rumsfeld, J.S., Brooks, S.C., Aufderheide, T.P., Leary, M., Bradley, S.M., Nkonde-Price, C., Schwamm, L.H., Jessup, M., Ferrer, J.M., Merchant, R.M. *et al.* (2016) Use of Mobile Devices, Social Media, and Crowdsourcing as Digital Strategies to Improve Emergency Cardiovascular Care: A Scientific Statement From the American Heart Association. *Circulation*, **134**, e87-e108.
41. Wazny, K. (2017) "Crowdsourcing" ten years in: A review. *J Glob Health*, **7**, 020602.
42. Grieneisen, L.E. and Blekhman, R. (2018) Crowdsourcing Our National Gut. *mSystems*, **3**.
43. Zhou, N., Siegel, Z.D., Zarecor, S., Lee, N., Campbell, D.A., Andorf, C.M., Nettleton, D., Lawrence-Dill, C.J., Ganapathysubramanian, B., Kelly, J.W. *et al.* (2018) Crowdsourcing image analysis for plant phenomics to generate ground truth data for machine learning. *PLoS Comput Biol*, **14**, e1006337.
44. Park, A.J., Ko, J.M. and Swerlick, R.A. (2018) Crowdsourcing dermatology: DataDerm, big data analytics, and machine learning technology. *J Am Acad Dermatol*, **78**, 643-644.
45. Wallace, B.C., Noel-Storr, A., Marshall, I.J., Cohen, A.M., Smalheiser, N.R. and Thomas, J. (2017) Identifying reports of randomized controlled trials (RCTs) via a hybrid machine learning and crowdsourcing approach. *J Am Med Inform Assoc*, **24**, 1165-1168.

46. Bravo, A., Li, T.S., Su, A.I., Good, B.M. and Furlong, L.I. (2016) Combining machine learning, crowdsourcing and expert knowledge to detect chemical-induced diseases in text. *Database (Oxford)*, **2016**.
47. Shamir, L., Yerby, C., Simpson, R., von Benda-Beckmann, A.M., Tyack, P., Samarra, F., Miller, P. and Wallin, J. (2014) Classification of large acoustic datasets using machine learning and crowdsourcing: application to whale calls. *J Acoust Soc Am*, **135**, 953-962.
48. Bennett, M.J., Schlunegger, M.P. and Eisenberg, D. (1995) 3D domain swapping: a mechanism for oligomer assembly. *Protein Sci*, **4**, 2455-2468.
49. Schlunegger, M.P., Bennett, M.J. and Eisenberg, D. (1997) Oligomer formation by 3D domain swapping: a model for protein assembly and misassembly. *Adv Protein Chem*, **50**, 61-122.
50. Hakansson, M. and Linse, S. (2002) Protein reconstitution and 3D domain swapping. *Curr Protein Pept Sci*, **3**, 629-642.
51. Liu, Y. and Eisenberg, D. (2002) 3D domain swapping: as domains continue to swap. *Protein Sci*, **11**, 1285-1299.
52. Bennett, M.J., Sawaya, M.R. and Eisenberg, D. (2006) Deposition diseases and 3D domain swapping. *Structure*, **14**, 811-824.
53. Shameer, K. and Sowdhamini, R. (2012) Functional repertoire, molecular pathways and diseases associated with 3D domain swapping in the human proteome. *J Clin Bioinforma*, **2**, 8.

54. Shameer, K., Shingate, P.N., Manjunath, S.C., Karthika, M., Pugalenth, G. and Sowdhamini, R. (2011) 3DSwap: curated knowledgebase of proteins involved in 3D domain swapping. *Database (Oxford)*, **2011**, bar042.
55. Shameer, K., Pugalenth, G., Kandaswamy, K.K. and Sowdhamini, R. (2011) 3dswap-pred: prediction of 3D domain swapping from protein sequence using Random Forest approach. *Protein Pept Lett*, **18**, 1010-1020.
56. Shameer, K., Pugalenth, G., Kandaswamy, K.K., Suganthan, P.N., Archunan, G. and Sowdhamini, R. (2010) Insights into Protein Sequence and Structure-Derived Features Mediating 3D Domain Swapping Mechanism using Support Vector Machine Based Approach. *Bioinform Biol Insights*, **4**, 33-42.
57. Kursa, M.B. and Rudnicki, W.R. (2010) Feature Selection with the Boruta Package. *2010*, **36**, 13.
58. Buitinck, L., Louppe, G., Blondel, M., Pedregosa, F., Mueller, A., Grisel, O., Niculae, V., Prettenhofer, P., Gramfort, A. and Grobler, J. (2013) API design for machine learning software: experiences from the scikit-learn project. *arXiv preprint arXiv:1309.0238*.
59. Pedregosa, F., Ga, #235, Varoquaux, l., Gramfort, A., Michel, V., Thirion, B., Grisel, O., Blondel, M., Prettenhofer, P. *et al.* (2011) Scikit-learn: Machine Learning in Python. *J. Mach. Learn. Res.*, **12**, 2825-2830.
60. Chen, T. and Guestrin, C. (2016), *Proceedings of the 22nd ACM SIGKDD International Conference on Knowledge Discovery and Data Mining*. ACM, San Francisco, California, USA, pp. 785-794.



61. Popescu, M.-C., Balas, V.E., Perescu-Popescu, L. and Mastorakis, N. (2009) Multilayer perceptron and neural networks. *WSEAS Trans. Cir. and Sys.*, **8**, 579-588.
62. Song, K.M., Lee, S. and Ban, C. (2012) Aptamers and their biological applications. *Sensors (Basel)*, **12**, 612-631.
63. Deng, B., Lin, Y., Wang, C., Li, F., Wang, Z., Zhang, H., Li, X.F. and Le, X.C. (2014) Aptamer binding assays for proteins: the thrombin example--a review. *Anal Chim Acta*, **837**, 1-15.
64. Suravajhala, P., Burri, H.V.R. and Heiskanen, A. (2014) Combining aptamers and in silico interaction studies to decipher the function of hypothetical proteins. *European Chemical Bulletin*, **3**, 809-810.
65. Schott, J.M., Aisen, P.S., Cummings, J.L., Howard, R.J. and Fox, N.C. (2019) Unsuccessful trials of therapies for Alzheimer's disease. *Lancet*, **393**, 29.
66. Corbett, A., Pickett, J., Burns, A., Corcoran, J., Dunnett, S.B., Edison, P., Hagan, J.J., Holmes, C., Jones, E., Katona, C. *et al.* (2012) Drug repositioning for Alzheimer's disease. *Nat Rev Drug Discov*, **11**, 833-846.
67. Shameer, K., Glicksberg, B.S., Hodos, R., Johnson, K.W., Badgeley, M.A., Readhead, B., Tomlinson, M.S., O'Connor, T., Miotto, R., Kidd, B.A. *et al.* (2018) Systematic analyses of drugs and disease indications in RepurposeDB reveal pharmacological, biological and epidemiological factors influencing drug repositioning. *Brief Bioinform*, **19**, 656-678.

68. Hodos, R.A., Kidd, B.A., Shameer, K., Readhead, B.P. and Dudley, J.T. (2016) In silico methods for drug repurposing and pharmacology. *Wiley Interdiscip Rev Syst Biol Med*, **8**, 186-210.
69. Shameer, K., Readhead, B. and Dudley, J.T. (2015) Computational and experimental advances in drug repositioning for accelerated therapeutic stratification. *Curr Top Med Chem*, **15**, 5-20.
